# Supplementary material for: Lanthanide-induced shift reagents enable the structural elucidation of natural products in inseparable complex mixtures – the case of elemenal from Inula helenium L. (Asteraceae)
Source: Royal Society of Chemistry journal article supplement (doi:10.1039/c5ra13109j), 2015-01-01

**Electronic supplementary information**

**for**

Lanthanide-induced shift reagents enable structural elucidation of natural products in inseparable complex mixtures - The case of elemenal from *Inula helenium* L. (Asteraceae)

Marija S. Genčić and Niko S. Radulović\*

*Department of Chemistry, Faculty of Science and Mathematics, University of Niš, Višegradska  
33, 18000, Niš, Serbia*

**Fig. S1.** Second order signal multiplicity of protons from the vinyl group of elemental at  $\delta_H$  5.83 (a) and 4.88-4.95 (b) in the experimental (red colored) and simulated spectra (blue colored).

WinDNMR software was used for this simulation.

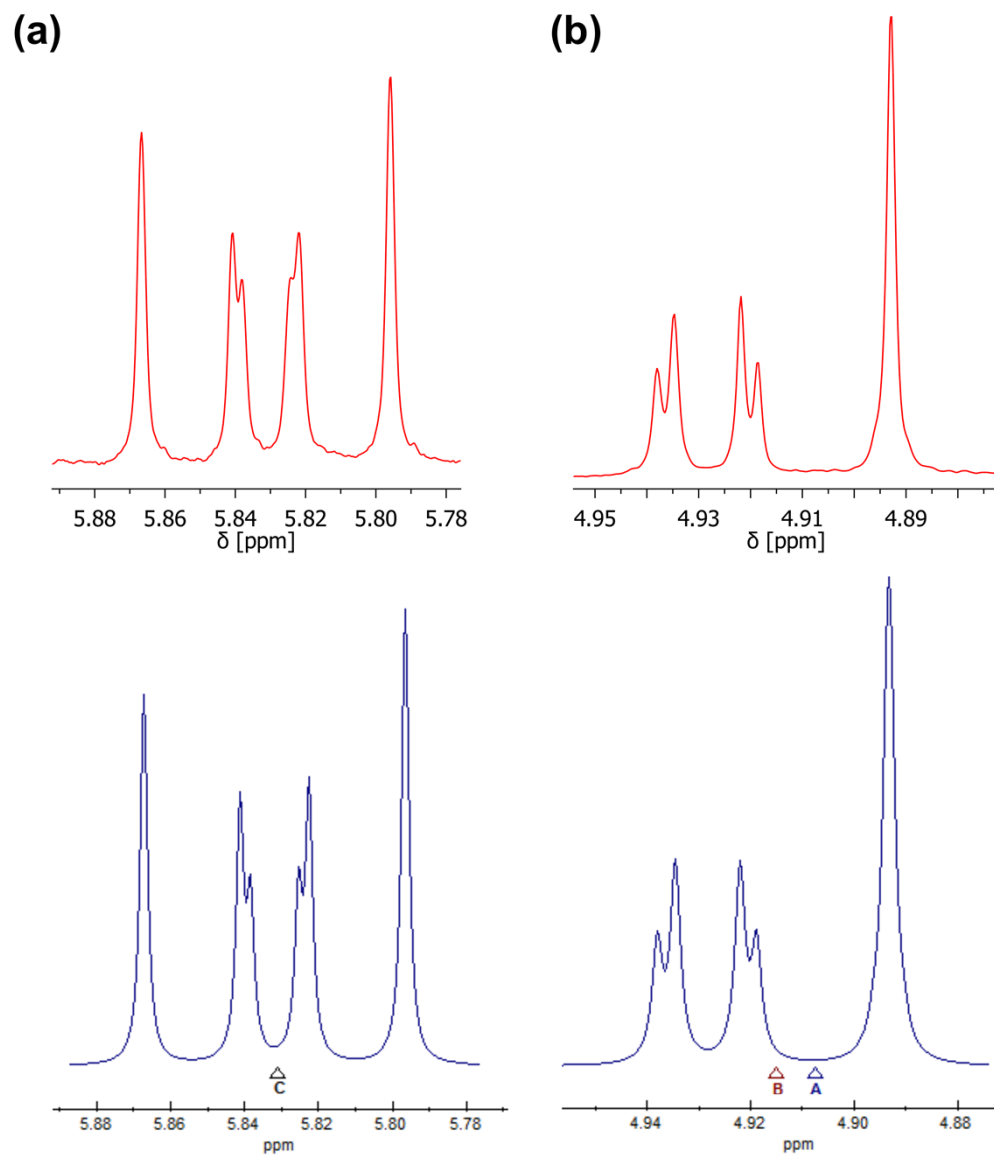

**Fig S2.** Fitting of the calculated ( $\Delta_{\text{cal}}$ ) to the observed ( $\Delta_{\text{Eu}}$ ) lanthanide-induced shift values for elemental-Eu(*fod*)<sub>3</sub> complex (H-12, H-13a and H-13b protons were excluded due to a significant share of the contact shift) for the position of europium at  $r_o = 2.328 \text{ \AA}$ ,  $\alpha_o = 120^\circ$  and  $\beta_o = 180^\circ$ .

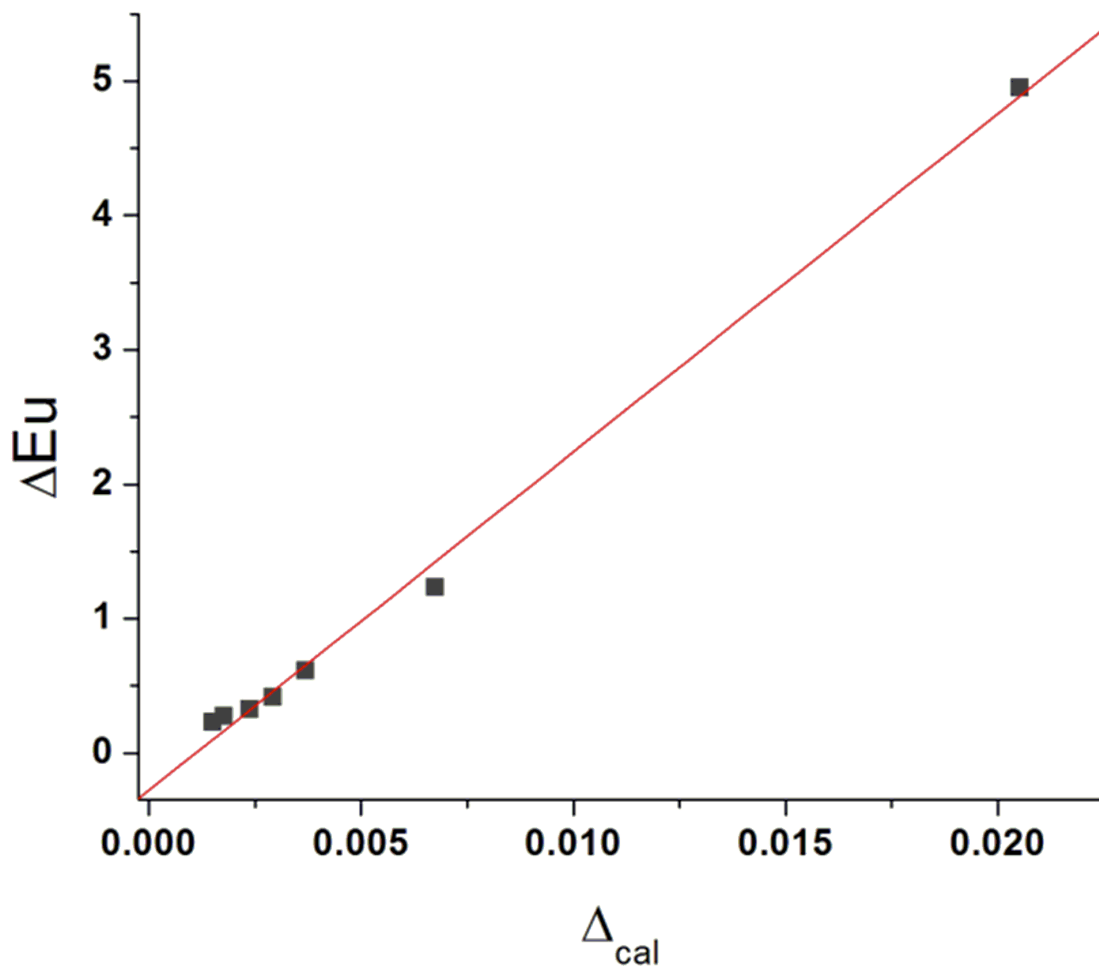

**Fig. S3.** The most likely conformation of elemental-Eu(fod)<sub>3</sub> complex (in a Cartesian coordinate system) obtained by the lanthanide probe method ( $r_o = 2.328 \text{ \AA}$ ,  $\alpha_o = 120^\circ$  and  $\beta_o = 180^\circ$ ). The parameters required for the calculation of  $\Delta_{\text{cal}}$  values according to the McConnell-Robertson equation are illustrated for proton H-13b;  $r_i$  is the distance between europium and this nucleus, and  $\theta_i$  is the angle between the vector corresponding to  $r_i$  and the vector  $r_o$  representing the Eu–O bond.

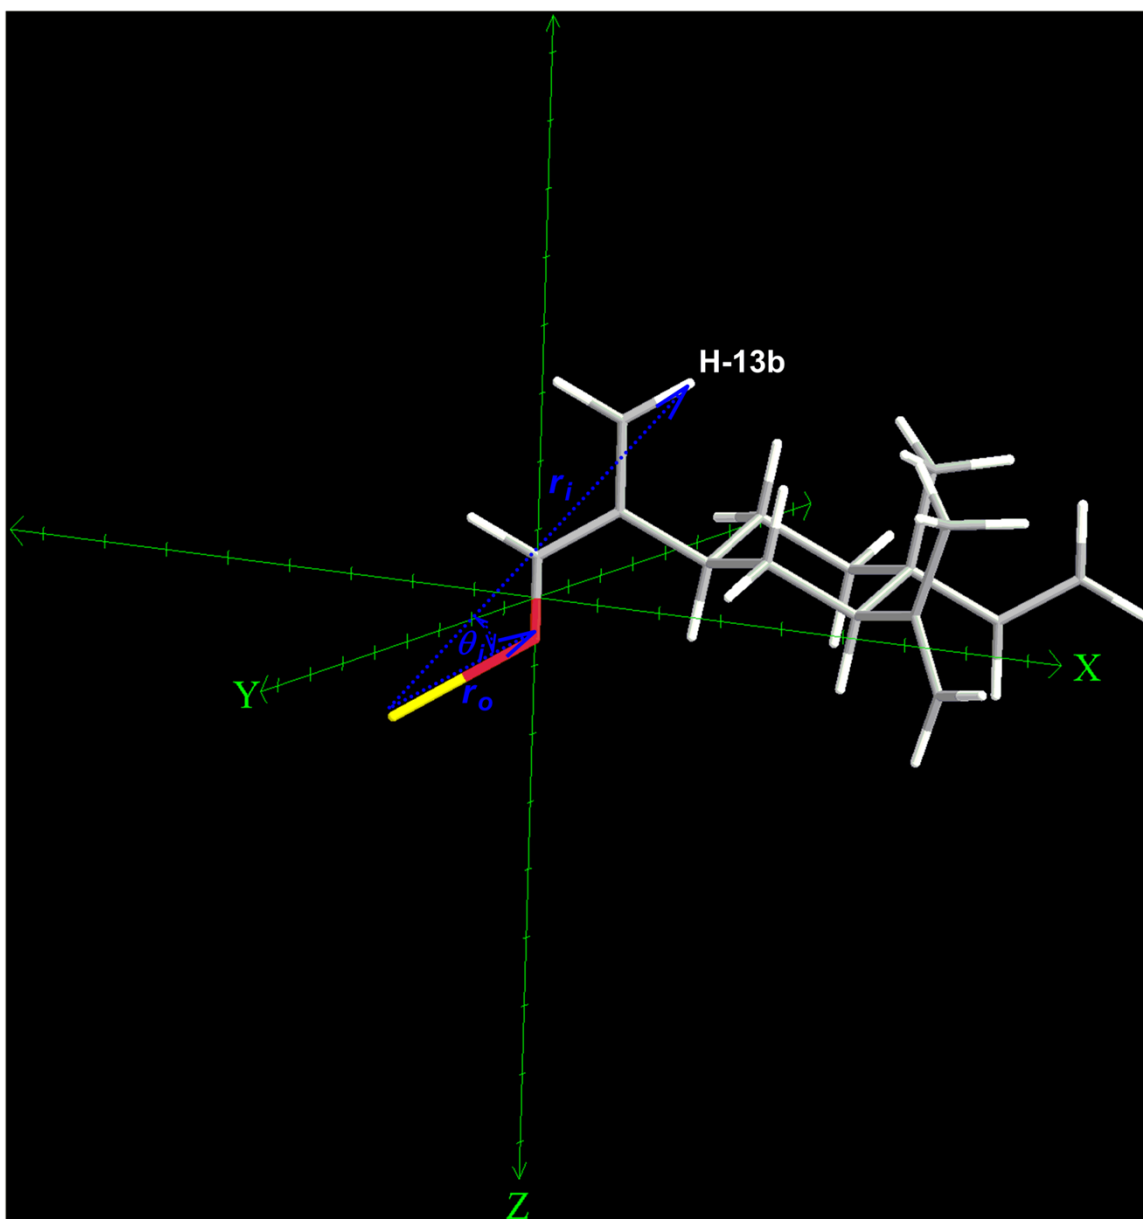

Supplement: c5ra13109j1.pdf [file c5ra13109j1.pdf]
